# Supplementary material for: Biogeochemical water type influences community composition, species richness, and biomass in megadiverse Amazonian fish assemblages
Source: PubMed Central journal article supplement (PMC7501869; doi:10.1038/s41598-020-72349-0), 2020-09-18
Supplement: 41598_2020_72349_MOESM3_ESM.pdf [file 41598_2020_72349_MOESM3_ESM.pdf]

**Online Resource**

**Supplementary Tables**

**Biogeochemical water type influences community composition, species richness, and biomass in megadiverse Amazonian fish assemblages**

Juan David Bogotá-Gregory, Flávio C. T. Lima, Sandra B. Correa, Cárlison Silva-Oliveira, David G. Jenkins, Frank R. Ribeiro, Nathan R. Lovejoy, Roberto E. Reis, William G. R. Crampton \*

\* Corresponding author: Department of Biology, University of Central Florida, 4100 Libra Dr., 32816 Orlando, FL, USA. Email: [crampton@ucf.edu](mailto:crampton@ucf.edu)

**Table S1.** Physico-chemical parameters for the blackwater, clearwater, and whitewater waters of the Santarém region, divided by habitat type and season.

| Water type | Habitat         | Season | Temperature (°C) |      |      | pH   |      |      | DO (mg·L <sup>-1</sup> ) |      |      |
|------------|-----------------|--------|------------------|------|------|------|------|------|--------------------------|------|------|
|            |                 |        | Min.             | Max. | Mean | Min. | Max. | Mean | Min.                     | Max. | Mean |
| Blackwater | Floodplain lake | Low    | 29.3             | 31.2 | 30.2 | 4.3  | 5.6  | 4.8  | 2.7                      | 8.3  | 5.7  |
|            |                 | High   | 29.6             | 30.8 | 30.3 | 4.8  | 6.4  | 5.5  | 3.9                      | 4.7  | 4.3  |
|            | River margin    | Low    | 29.0             | 32.5 | 30.5 | 4.8  | 6.2  | 5.7  | 4.7                      | 11.5 | 8.1  |
|            |                 | High   | 29.2             | 30.6 | 30.1 | 5.0  | 6.0  | 5.5  | 4.5                      | 9.1  | 5.5  |
| Clearwater | Floodplain lake | Low    | 29.7             | 31.7 | 30.5 | 4.3  | 7.2  | 5.9  | 4.2                      | 12.0 | 8.9  |
|            |                 | High   | 29.3             | 30.6 | 30.0 | 5.4  | 7.0  | 6.1  | 3.0                      | 4.5  | 4.0  |
|            | River margin    | Low    | 29.1             | 30.7 | 30.1 | 6.3  | 7.3  | 6.8  | 5.2                      | 11.3 | 8.6  |
|            |                 | High   | 29.3             | 31.0 | 29.9 | 5.6  | 7.4  | 6.2  | 4.2                      | 5.4  | 4.7  |
| Whitewater | Floodplain lake | Low    | 28.6             | 32.0 | 30.0 | 6.9  | 7.8  | 7.2  | 0.7                      | 9.2  | 5.0  |
|            |                 | High   | 28.7             | 34.4 | 30.2 | 5.5  | 7.7  | 6.7  | 0.4                      | 2.7  | 1.5  |
|            | River margin    | Low    | 29.3             | 31.2 | 30.1 | 7.0  | 7.4  | 7.1  | 3.4                      | 9.3  | 6.5  |
|            |                 | High   | 28.0             | 30.4 | 29.1 | 5.7  | 7.0  | 6.3  | 2.3                      | 2.8  | 2.6  |

| Water type | Habitat         | Season | Conductivity (μS·cm <sup>-1</sup> ) |       |       | Turbidity (NTU) |       |       |
|------------|-----------------|--------|-------------------------------------|-------|-------|-----------------|-------|-------|
|            |                 |        | Min.                                | Max.  | Mean  | Min.            | Max.  | Mean  |
| Blackwater | Floodplain lake | Low    | 7.0                                 | 9.6   | 8.1   | 0.3             | 2.1   | 1.2   |
|            |                 | High   | 7.5                                 | 9.8   | 8.5   | 1.3             | 2.0   | 1.6   |
|            | River margin    | Low    | 7.5                                 | 11.2  | 9.1   | 0.1             | 7.6   | 2.7   |
|            |                 | High   | 7.8                                 | 9.9   | 8.8   | 1.3             | 2.1   | 1.7   |
| Clearwater | Floodplain lake | Low    | 4.4                                 | 13.4  | 10.0  | 3.6             | 13.5  | 6.6   |
|            |                 | High   | 13.3                                | 15.7  | 14.4  | 2.5             | 7.1   | 4.9   |
|            | River margin    | Low    | 11.8                                | 16.1  | 14.8  | 0.2             | 8.0   | 4.7   |
|            |                 | High   | 13.8                                | 16.1  | 14.8  | 2.0             | 9.6   | 6.0   |
| Whitewater | Floodplain lake | Low    | 78.1                                | 123.4 | 102.9 | 10.7            | 169.0 | 88.1  |
|            |                 | High   | 53.5                                | 81.5  | 60.3  | 13.1            | 45.6  | 31.2  |
|            | River margin    | Low    | 46.7                                | 64.5  | 54.3  | 27.9            | 305.0 | 129.3 |
|            |                 | High   | 52.7                                | 61.0  | 56.5  | 44.9            | 89.0  | 64.4  |

**Table S2.** Permutational multivariate analysis of variance (PERMANOVA) comparisons of physico-chemical water parameters between blackwater (BW), clearwater (CW), and whitewater (WW) systems of the Santarém region. All comparisons are significant at  $\alpha = 0.001$ . DF = degrees of freedom.

| Comparison        | River Margins (RM) |      |       | Floodplain lakes (FL) |      |       | Pooled RM and FL |      |       |
|-------------------|--------------------|------|-------|-----------------------|------|-------|------------------|------|-------|
|                   | Pseudo <i>F</i>    | R    | DF    | Pseudo <i>F</i>       | R    | DF    | Pseudo <i>F</i>  | R    | DF    |
| Global (BW-CW=WW) | 20.9               | 0.75 | 2, 33 | 24.1                  | 0.77 | 2, 34 | 38.4             | 0.73 | 2, 68 |
| BW-CW             | 5.4                | 0.45 | 1, 22 | 3.5                   | 0.37 | 1, 22 | 7.2              | 0.36 | 1, 46 |
| BW-WW             | 33.1               | 0.78 | 1, 21 | 43.9                  | 0.81 | 1, 22 | 67.9             | 0.77 | 1, 45 |
| CW-WW             | 22.3               | 0.71 | 1, 21 | 25.0                  | 0.73 | 1, 22 | 42.0             | 0.69 | 1, 45 |

**Table S3.** List of sampled fish species<sup>1</sup>. BW = blackwater. CW = clearwater. WW = whitewater. RM = river margin. FL = floodplain lake. cf. = conferre.

| Taxon                                                       | River Margin (RM) |    |    | Floodplain lake (FL) |     |    | RM & FL |     |    | RM   | FL  |
|-------------------------------------------------------------|-------------------|----|----|----------------------|-----|----|---------|-----|----|------|-----|
|                                                             | BW                | CW | WW | BW                   | CW  | WW | BW      | CW  | WW |      |     |
| <b>Order Myliobatiformes</b>                                |                   |    |    |                      |     |    |         |     |    |      |     |
| <b>Family Potamotrygonidae</b>                              |                   |    |    |                      |     |    |         |     |    |      |     |
| <i>Potamotrygon motoro</i> (Müller & Henle 1841)            | 0                 | 0  | 0  | 0                    | 1   | 2  | 0       | 1   | 2  | 0    | 3   |
| <i>Potamotrygon orbignyi</i> (Castelnau 1855)               | 0                 | 1  | 0  | 0                    | 8   | 0  | 0       | 9   | 0  | 1    | 8   |
| <i>Potamotrygon scobina</i> Garman 1913                     | 0                 | 1  | 0  | 0                    | 0   | 0  | 0       | 1   | 0  | 1    | 0   |
| <b>Order Osteoglossiformes</b>                              |                   |    |    |                      |     |    |         |     |    |      |     |
| <b>Family Osteoglossidae</b>                                |                   |    |    |                      |     |    |         |     |    |      |     |
| <i>Osteoglossum bicirrhosum</i> (Cuvier 1829)               | 0                 | 0  | 1  | 0                    | 0   | 2  | 0       | 0   | 3  | 1    | 2   |
| <b>Order Clupeiformes</b>                                   |                   |    |    |                      |     |    |         |     |    |      |     |
| <b>Family Clupeidae</b>                                     |                   |    |    |                      |     |    |         |     |    |      |     |
| <i>Rhinosardinia amazonica</i> (Steindachner 1879)          | 0                 | 0  | 0  | 0                    | 0   | 1  | 0       | 0   | 1  | 0    | 1   |
| <b>Family Engraulidae</b>                                   |                   |    |    |                      |     |    |         |     |    |      |     |
| <i>Amazonsprattus scintilla</i> Roberts 1984                | 1                 | 0  | 0  | 0                    | 0   | 0  | 1       | 0   | 0  | 1    | 0   |
| <i>Anchovia surinamensis</i> (Bleeker 1865)                 | 1160              | 92 | 9  | 33                   | 101 | 3  | 1193    | 193 | 12 | 1261 | 137 |
| <i>Anchoviella alleni</i> (Myers 1940)                      | 2                 | 1  | 4  | 1                    | 0   | 0  | 3       | 1   | 4  | 7    | 1   |
| <i>Anchoviella cf. cayennensis</i> (Puyo 1946)              | 0                 | 0  | 0  | 0                    | 3   | 0  | 0       | 3   | 0  | 0    | 3   |
| <i>Anchoviella cf. lepidentostole</i> (Fowler 1911)         | 47                | 1  | 49 | 89                   | 10  | 0  | 136     | 11  | 49 | 97   | 99  |
| <i>Anchoviella guianensis</i> (Eigenmann 1912)              | 2                 | 3  | 0  | 12                   | 0   | 0  | 14      | 3   | 0  | 5    | 12  |
| <i>Anchoviella juruasanga</i> Loeb 2012                     | 11                | 2  | 0  | 0                    | 0   | 2  | 11      | 2   | 2  | 13   | 2   |
| <i>Anchoviella sp.</i>                                      | 11                | 0  | 0  | 0                    | 0   | 0  | 11      | 0   | 0  | 11   | 0   |
| <i>Lycengraulis batesii</i> (Günther 1868)                  | 1                 | 0  | 97 | 0                    | 2   | 1  | 1       | 2   | 98 | 98   | 3   |
| <i>Pterengraulis atherinoides</i> (Linnaeus 1766)           | 0                 | 0  | 10 | 0                    | 0   | 8  | 0       | 0   | 18 | 10   | 8   |
| <b>Family Pritigasteridae</b>                               |                   |    |    |                      |     |    |         |     |    |      |     |
| <i>Ilisha amazonica</i> (Miranda Ribeiro 1920)              | 0                 | 3  | 2  | 0                    | 0   | 2  | 0       | 3   | 4  | 5    | 2   |
| <i>Pellona flavipinnis</i> (Valenciennes 1837)              | 1                 | 4  | 27 | 0                    | 2   | 40 | 1       | 6   | 67 | 32   | 42  |
| <b>Order Characiformes</b>                                  |                   |    |    |                      |     |    |         |     |    |      |     |
| <b>Family Erythrinidae</b>                                  |                   |    |    |                      |     |    |         |     |    |      |     |
| <i>Hoplias malabaricus</i> (Bloch 1794)                     | 5                 | 0  | 0  | 5                    | 1   | 28 | 10      | 1   | 28 | 5    | 34  |
| <b>Family Cynodontidae</b>                                  |                   |    |    |                      |     |    |         |     |    |      |     |
| <i>Cynodon gibbus</i> (Spix & Agassiz 1829)                 | 0                 | 1  | 0  | 0                    | 0   | 15 | 0       | 1   | 15 | 1    | 15  |
| <i>Hydrolycus scomberoides</i> (Cuvier 1819)                | 0                 | 0  | 6  | 0                    | 0   | 21 | 0       | 0   | 27 | 6    | 21  |
| <i>Rhaphiodon vulpinus</i> Spix & Agassiz 1829              | 0                 | 1  | 19 | 0                    | 0   | 24 | 0       | 1   | 43 | 20   | 24  |
| <b>Family Serrasalminidae</b>                               |                   |    |    |                      |     |    |         |     |    |      |     |
| <i>Catoprion mento</i> (Cuvier 1819)                        | 0                 | 1  | 0  | 3                    | 0   | 0  | 3       | 1   | 0  | 1    | 3   |
| <i>Colossoma macropomum</i> (Cuvier 1816)                   | 0                 | 0  | 0  | 0                    | 1   | 0  | 0       | 1   | 0  | 0    | 1   |
| <i>Metynnis hypsauchen</i> (Müller & Troschel 1844)         | 6                 | 1  | 0  | 1                    | 0   | 0  | 7       | 1   | 0  | 7    | 1   |
| <i>Metynnis lippincottianus</i> (Cope 1870)                 | 0                 | 0  | 0  | 0                    | 1   | 0  | 0       | 1   | 0  | 0    | 1   |
| <i>Metynnis luna</i> Cope 1878                              | 7                 | 40 | 0  | 1                    | 1   | 3  | 8       | 41  | 3  | 47   | 5   |
| <i>Myloplus schomburgkii</i> (Jardine 1841)                 | 0                 | 1  | 0  | 0                    | 0   | 0  | 0       | 1   | 0  | 1    | 0   |
| <i>Myloplus sp.</i>                                         | 0                 | 0  | 0  | 1                    | 1   | 0  | 1       | 1   | 0  | 0    | 2   |
| <i>Mylossoma aureum</i> (Spix & Agassiz 1829)               | 0                 | 0  | 3  | 0                    | 0   | 29 | 0       | 0   | 32 | 3    | 29  |
| <i>Mylossoma duriventre</i> (Cuvier 1818)                   | 0                 | 0  | 2  | 0                    | 0   | 25 | 0       | 0   | 27 | 2    | 25  |
| <i>Pristobrycon striolatus</i> (Steindachner 1908)          | 0                 | 0  | 0  | 0                    | 0   | 1  | 0       | 0   | 1  | 0    | 1   |
| <i>Pygocentrus nattereri</i> Kner 1858                      | 0                 | 0  | 2  | 0                    | 0   | 13 | 0       | 0   | 15 | 2    | 13  |
| <i>Pygopristis denticulata</i> (Cuvier 1819)                | 1                 | 0  | 0  | 2                    | 0   | 1  | 3       | 0   | 1  | 1    | 3   |
| <i>Serrasalmus eigenmanni</i> Norman 1929                   | 1                 | 0  | 1  | 0                    | 0   | 2  | 1       | 0   | 3  | 2    | 2   |
| <i>Serrasalmus elongatus</i> Kner 1858                      | 0                 | 0  | 0  | 0                    | 0   | 1  | 0       | 0   | 1  | 0    | 1   |
| <i>Serrasalmus gouldingi</i> Fink & Machado-Allison 1992    | 7                 | 1  | 0  | 1                    | 0   | 0  | 8       | 1   | 0  | 8    | 1   |
| <i>Serrasalmus maculatus</i> Kner 1858                      | 1                 | 2  | 3  | 0                    | 0   | 54 | 1       | 2   | 57 | 6    | 54  |
| <i>Serrasalmus manueli</i> (Fernández-Yépez & Ramírez 1967) | 0                 | 0  | 0  | 1                    | 0   | 0  | 1       | 0   | 0  | 0    | 1   |
| <i>Serrasalmus rhombeus</i> (Linnaeus 1766)                 | 1                 | 0  | 1  | 0                    | 1   | 14 | 1       | 1   | 15 | 2    | 15  |

| Taxon                                                     | River Margin (RM) |     |    | Floodplain lake (FL) |    |     | RM & FL |     |     | RM  | FL  |
|-----------------------------------------------------------|-------------------|-----|----|----------------------|----|-----|---------|-----|-----|-----|-----|
|                                                           | BW                | CW  | WW | BW                   | CW | WW  | BW      | CW  | WW  |     |     |
| <b>Family Hemiodontidae</b>                               |                   |     |    |                      |    |     |         |     |     |     |     |
| <i>Anodus cf. elongatus</i> Agassiz 1829                  | 0                 | 0   | 1  | 0                    | 5  | 3   | 0       | 5   | 4   | 1   | 8   |
| <i>Argonectes robertsi</i> Langeani 1999                  | 0                 | 6   | 0  | 6                    | 4  | 0   | 6       | 10  | 0   | 6   | 10  |
| <i>Bivibranchia fowleri</i> (Steindachner 1908)           | 711               | 224 | 2  | 18                   | 46 | 0   | 729     | 270 | 2   | 937 | 64  |
| <i>Hemiodus atranalis</i> (Fowler 1940)                   | 0                 | 0   | 0  | 0                    | 6  | 0   | 0       | 6   | 0   | 0   | 6   |
| <i>Hemiodus gracilis</i> Günther 1864                     | 111               | 7   | 0  | 131                  | 2  | 0   | 242     | 9   | 0   | 118 | 133 |
| <i>Hemiodus immaculatus</i> Kner 1858                     | 25                | 11  | 0  | 19                   | 54 | 0   | 44      | 65  | 0   | 36  | 73  |
| <i>Hemiodus microlepis</i> (Kner 1858)                    | 1                 | 6   | 1  | 2                    | 72 | 2   | 3       | 78  | 3   | 8   | 76  |
| <i>Hemiodus unimaculatus</i> (Bloch 1794)                 | 5                 | 9   | 0  | 9                    | 36 | 0   | 14      | 45  | 0   | 14  | 45  |
| <i>Micromischodus sugillatus</i> Roberts 1971             | 4                 | 0   | 0  | 12                   | 2  | 0   | 16      | 2   | 0   | 4   | 14  |
| <b>Family Anostomidae</b>                                 |                   |     |    |                      |    |     |         |     |     |     |     |
| <i>Anostomoides laticeps</i> (Eigenmann 1912)             | 0                 | 0   | 0  | 0                    | 1  | 0   | 0       | 1   | 0   | 0   | 1   |
| <i>Laemolyta proxima</i> (Garman 1890)                    | 0                 | 19  | 1  | 1                    | 61 | 13  | 1       | 80  | 14  | 20  | 75  |
| <i>Laemolyta taeniata</i> (Kner 1858)                     | 0                 | 1   | 0  | 1                    | 0  | 0   | 1       | 1   | 0   | 1   | 1   |
| <i>Leporinus altipinnis</i> Borodin 1929                  | 3                 | 0   | 0  | 9                    | 1  | 0   | 12      | 1   | 0   | 3   | 10  |
| <i>Leporinus fasciatus</i> (Bloch 1794)                   | 1                 | 14  | 0  | 0                    | 11 | 0   | 1       | 25  | 0   | 15  | 11  |
| <i>Leporinus friderici</i> (Bloch 1794)                   | 0                 | 0   | 0  | 1                    | 0  | 2   | 1       | 0   | 2   | 0   | 3   |
| <i>Megaleporinus trifasciatus</i> (Steindachner 1876)     | 0                 | 1   | 1  | 0                    | 0  | 1   | 0       | 1   | 2   | 2   | 1   |
| <i>Pseudanos gracilis</i> (Kner 1858)                     | 2                 | 0   | 0  | 0                    | 0  | 0   | 2       | 0   | 0   | 2   | 0   |
| <i>Pseudanos trimaculatus</i> (Kner 1858)                 | 0                 | 1   | 0  | 0                    | 0  | 0   | 0       | 1   | 0   | 1   | 0   |
| <i>Rhytidodus argenteofuscus</i> Kner 1858                | 0                 | 1   | 6  | 0                    | 4  | 2   | 0       | 5   | 8   | 7   | 6   |
| <i>Rhytidodus microlepis</i> Kner 1858                    | 0                 | 0   | 6  | 0                    | 0  | 6   | 0       | 0   | 12  | 6   | 6   |
| <i>Schizodon fasciatus</i> Spix & Agassiz 1829            | 1                 | 4   | 8  | 0                    | 3  | 57  | 1       | 7   | 65  | 13  | 60  |
| <i>Schizodon vittatus</i> (Valenciennes 1850)             | 7                 | 7   | 0  | 0                    | 0  | 2   | 7       | 7   | 2   | 14  | 2   |
| <b>Family Chilodontidae</b>                               |                   |     |    |                      |    |     |         |     |     |     |     |
| <i>Caenotropus labyrinthicus</i> (Kner 1858)              | 1                 | 3   | 0  | 0                    | 8  | 0   | 1       | 11  | 0   | 4   | 8   |
| <b>Family Curimatidae</b>                                 |                   |     |    |                      |    |     |         |     |     |     |     |
| <i>Curimata ocellata</i> Eigenmann & Eigenmann 1889       | 0                 | 0   | 0  | 0                    | 0  | 1   | 0       | 0   | 1   | 0   | 1   |
| <i>Curimata roseni</i> Vari 1989                          | 1                 | 24  | 2  | 0                    | 26 | 1   | 1       | 50  | 3   | 27  | 27  |
| <i>Curimata vittata</i> (Kner 1858)                       | 0                 | 0   | 0  | 19                   | 5  | 14  | 19      | 5   | 14  | 0   | 38  |
| <i>Curimatella alburnus</i> (Müller & Troschel 1844)      | 0                 | 0   | 0  | 0                    | 0  | 102 | 0       | 0   | 102 | 0   | 102 |
| <i>Curimatella immaculata</i> (Fernández-Yépez 1948)      | 149               | 0   | 0  | 1                    | 1  | 0   | 150     | 1   | 0   | 149 | 2   |
| <i>Curimatella meyeri</i> (Steindachner 1882)             | 111               | 0   | 1  | 0                    | 0  | 92  | 111     | 0   | 93  | 112 | 92  |
| <i>Cyphocharax leucostictus</i> (Eigenmann & Eigenmann)   | 0                 | 34  | 1  | 80                   | 58 | 0   | 80      | 92  | 1   | 35  | 138 |
| <i>Cyphocharax plumbeus</i> (Eigenmann & Eigenmann 1889)  | 0                 | 0   | 6  | 0                    | 0  | 27  | 0       | 0   | 33  | 6   | 27  |
| <i>Cyphocharax spiluropsis</i> (Eigenmann & Eigenmann)    | 0                 | 0   | 0  | 0                    | 0  | 73  | 0       | 0   | 73  | 0   | 73  |
| <i>Potamorhina altamazonica</i> (Cope 1878)               | 0                 | 0   | 1  | 0                    | 0  | 3   | 0       | 0   | 4   | 1   | 3   |
| <i>Potamorhina latior</i> (Spix & Agassiz 1829)           | 0                 | 0   | 0  | 0                    | 0  | 25  | 0       | 0   | 25  | 0   | 25  |
| <i>Potamorhina</i> sp.                                    | 15                | 0   | 1  | 4                    | 0  | 0   | 19      | 0   | 1   | 16  | 4   |
| <i>Pristigaster cayana</i> Cuvier 1829                    | 0                 | 1   | 0  | 0                    | 0  | 6   | 0       | 1   | 6   | 1   | 6   |
| <i>Psectrogaster amazonica</i> Eigenmann & Eigenmann 1889 | 0                 | 0   | 2  | 0                    | 0  | 11  | 0       | 0   | 13  | 2   | 11  |
| <i>Psectrogaster rutiloides</i> (Kner 1858)               | 1                 | 0   | 0  | 0                    | 2  | 10  | 1       | 2   | 10  | 1   | 12  |
| <i>Steindachnerina bimaculata</i> (Steindachner 1876)     | 0                 | 2   | 1  | 0                    | 12 | 486 | 0       | 14  | 487 | 3   | 498 |
| <b>Family Prochilodontidae</b>                            |                   |     |    |                      |    |     |         |     |     |     |     |
| <i>Prochilodus nigricans</i> Spix & Agassiz 1829          | 0                 | 0   | 0  | 0                    | 0  | 1   | 0       | 0   | 1   | 0   | 1   |
| <i>Semaprochilodus insignis</i> (Jardine 1841)            | 0                 | 0   | 0  | 0                    | 1  | 0   | 0       | 1   | 0   | 0   | 1   |
| <i>Semaprochilodus taeniurus</i> (Valenciennes 1821)      | 0                 | 0   | 0  | 2                    | 0  | 0   | 2       | 0   | 0   | 0   | 2   |
| <b>Family Lebiasinidae</b>                                |                   |     |    |                      |    |     |         |     |     |     |     |
| <i>Copella arnoldi</i> (Regan 1912)                       | 0                 | 0   | 0  | 0                    | 0  | 2   | 0       | 0   | 2   | 0   | 2   |
| <i>Nannostomus digrammus</i> (Fowler 1913)                | 0                 | 0   | 0  | 40                   | 0  | 0   | 40      | 0   | 0   | 0   | 40  |
| <i>Nannostomus eques</i> Steindachner 1876                | 0                 | 0   | 0  | 1                    | 0  | 0   | 1       | 0   | 0   | 0   | 1   |
| <i>Pyrrhulina cf. obermulleri</i> Myers 1926              | 0                 | 0   | 0  | 0                    | 0  | 2   | 0       | 0   | 2   | 0   | 2   |

| Taxon                                                   | River Margin (RM) |    |    | Floodplain lake (FL) |      |     | RM & FL |      |     | RM  | FL   |
|---------------------------------------------------------|-------------------|----|----|----------------------|------|-----|---------|------|-----|-----|------|
|                                                         | BW                | CW | WW | BW                   | CW   | WW  | BW      | CW   | WW  |     |      |
| <b>Family Ctenoluciidae</b>                             |                   |    |    |                      |      |     |         |      |     |     |      |
| <i>Boulengerella cuvieri</i> (Spix & Agassiz 1829)      | 12                | 14 | 1  | 0                    | 1    | 2   | 12      | 15   | 3   | 27  | 3    |
| <i>Boulengerella lucius</i> (Cuvier 1816)               | 2                 | 0  | 0  | 1                    | 0    | 0   | 3       | 0    | 0   | 2   | 1    |
| <i>Boulengerella maculata</i> (Valenciennes 1850)       | 9                 | 4  | 3  | 7                    | 15   | 0   | 16      | 19   | 3   | 16  | 22   |
| <b>Family Tripotheidae</b>                              |                   |    |    |                      |      |     |         |      |     |     |      |
| <i>Agoniates halecinus</i> Müller & Troschel 1845       | 22                | 2  | 0  | 44                   | 5    | 1   | 66      | 7    | 1   | 24  | 50   |
| <i>Triporthus albus</i> Cope 1872                       | 68                | 35 | 4  | 25                   | 3    | 14  | 93      | 38   | 18  | 107 | 42   |
| <i>Triporthus auritus</i> (Valenciennes 1850)           | 7                 | 2  | 23 | 2                    | 4    | 12  | 9       | 6    | 35  | 32  | 18   |
| <i>Triporthus cf. angulatus</i> (Spix & Agassiz 1829)   | 1                 | 2  | 35 | 0                    | 3    | 155 | 1       | 5    | 190 | 38  | 158  |
| <b>Family Gasteropelecidae</b>                          |                   |    |    |                      |      |     |         |      |     |     |      |
| <i>Thoracocharax stellatus</i> (Kner 1858)              | 0                 | 0  | 4  | 0                    | 0    | 0   | 0       | 0    | 4   | 4   | 0    |
| <b>Family Bryconidae</b>                                |                   |    |    |                      |      |     |         |      |     |     |      |
| <i>Brycon melanopterus</i> (Cope 1872)                  | 0                 | 0  | 0  | 4                    | 0    | 0   | 4       | 0    | 0   | 0   | 4    |
| <i>Brycon "pesu" sp. A</i>                              | 1                 | 0  | 0  | 0                    | 0    | 0   | 1       | 0    | 0   | 1   | 0    |
| <i>Brycon "pesu" sp. B</i>                              | 8                 | 4  | 0  | 0                    | 5    | 0   | 8       | 9    | 0   | 12  | 5    |
| <i>Chalceus epakros</i> Zanata & Toledo-Piza 2004       | 0                 | 13 | 0  | 0                    | 14   | 0   | 0       | 27   | 0   | 13  | 14   |
| <i>Chalceus erythrurus</i> (Cope 1870)                  | 0                 | 0  | 0  | 0                    | 0    | 1   | 0       | 0    | 1   | 0   | 1    |
| <b>Family Iguanodectidae</b>                            |                   |    |    |                      |      |     |         |      |     |     |      |
| <i>Bryconops alburnoides</i> Kner 1858                  | 47                | 19 | 0  | 14                   | 16   | 3   | 61      | 35   | 3   | 66  | 33   |
| <i>Bryconops caudomaculatus</i> (Günther 1864)          | 4                 | 0  | 0  | 0                    | 4    | 17  | 4       | 4    | 17  | 4   | 21   |
| <i>Bryconops cf. melanurus</i> (Bloch 1794)             | 0                 | 0  | 0  | 111                  | 0    | 0   | 111     | 0    | 0   | 0   | 111  |
| <i>Bryconops cf. transitoria</i> Steindachner 1915      | 126               | 57 | 2  | 111                  | 1011 | 0   | 237     | 1068 | 2   | 185 | 1122 |
| <i>Bryconops durbiniae</i> (Eigenmann 1908)             | 244               | 1  | 0  | 275                  | 394  | 0   | 519     | 395  | 0   | 245 | 669  |
| <i>Iguanodectes polylepis</i> Géry 199                  | 0                 | 0  | 0  | 3                    | 2    | 2   | 3       | 2    | 2   | 0   | 7    |
| <b>Family Acestrorhynchidae</b>                         |                   |    |    |                      |      |     |         |      |     |     |      |
| <i>Acestrorhynchus abbreviatus</i> (Cope 1878)          | 1                 | 0  | 3  | 0                    | 0    | 80  | 1       | 0    | 83  | 4   | 80   |
| <i>Acestrorhynchus falcirostris</i> (Cuvier 1819)       | 4                 | 5  | 0  | 15                   | 17   | 3   | 19      | 22   | 3   | 9   | 35   |
| <i>Acestrorhynchus microlepis</i> (Jardine 1841)        | 120               | 54 | 0  | 17                   | 42   | 1   | 137     | 96   | 1   | 174 | 60   |
| <i>Acestrorhynchus minimus</i> Menezes 1969             | 16                | 0  | 0  | 37                   | 73   | 0   | 53      | 73   | 0   | 16  | 110  |
| <i>Lonchogenys ilisha</i> Myers 1927                    | 11                | 0  | 0  | 0                    | 0    | 0   | 11      | 0    | 0   | 11  | 0    |
| <b>Family Characidae</b>                                |                   |    |    |                      |      |     |         |      |     |     |      |
| <i>Aphyocharax alburnus</i> (Günther 1869)              | 0                 | 0  | 4  | 0                    | 0    | 6   | 0       | 0    | 10  | 4   | 6    |
| <i>Aphyocharax avary</i> Fowler 1913                    | 0                 | 0  | 0  | 0                    | 0    | 58  | 0       | 0    | 58  | 0   | 58   |
| <i>Aphyocharax nattereri</i> (Steindachner 1882)        | 0                 | 0  | 0  | 0                    | 0    | 2   | 0       | 0    | 2   | 0   | 2    |
| <i>Aphyodite grammica</i> Eigenmann 1912                | 0                 | 0  | 0  | 0                    | 134  | 298 | 0       | 134  | 298 | 0   | 432  |
| <i>Astyanax guianensis</i> Eigenmann 1909               | 5                 | 0  | 0  | 0                    | 29   | 0   | 5       | 29   | 0   | 5   | 29   |
| <i>Charax</i> sp.                                       | 0                 | 0  | 0  | 0                    | 0    | 24  | 0       | 0    | 24  | 0   | 24   |
| <i>Cheirodon micropterus</i> Eigenmann 1907             | 0                 | 0  | 0  | 0                    | 7    | 75  | 0       | 7    | 75  | 0   | 82   |
| <i>Creagrutus cracentis</i> Vari & Harold 2001          | 11                | 0  | 0  | 0                    | 0    | 1   | 11      | 0    | 1   | 11  | 1    |
| <i>Ctenobrycon spilurus</i> (Valenciennes 1850)         | 0                 | 0  | 0  | 0                    | 0    | 368 | 0       | 0    | 368 | 0   | 368  |
| <i>Hemigrammus analis</i> Durbin 1909                   | 0                 | 1  | 0  | 0                    | 7    | 0   | 0       | 8    | 0   | 1   | 7    |
| <i>Hemigrammus diagonicus</i> Mendonça & Wosiacki 2011  | 0                 | 0  | 0  | 0                    | 0    | 485 | 0       | 0    | 485 | 0   | 485  |
| <i>Hemigrammus durbiniae</i> Ota, Lima & Pavanelli 2015 | 0                 | 0  | 0  | 0                    | 0    | 1   | 0       | 0    | 1   | 0   | 1    |
| <i>Hemigrammus hyanuary</i> Durbin 1918                 | 0                 | 0  | 0  | 0                    | 9    | 0   | 0       | 9    | 0   | 0   | 9    |
| <i>Hemigrammus levis</i> Durbin 1908                    | 37                | 1  | 0  | 105                  | 223  | 0   | 142     | 224  | 0   | 38  | 328  |
| <i>Hemigrammus lunatus</i> Durbin 1918                  | 0                 | 0  | 0  | 0                    | 0    | 361 | 0       | 0    | 361 | 0   | 361  |
| <i>Hemigrammus</i> sp.                                  | 0                 | 0  | 0  | 0                    | 0    | 1   | 0       | 0    | 1   | 0   | 1    |
| <i>Hemigrammus unilineatus</i> (Gill 1858)              | 0                 | 0  | 0  | 0                    | 0    | 4   | 0       | 0    | 4   | 0   | 4    |
| <i>Hyphessobrycon copelandi</i> Durbin 1908             | 0                 | 0  | 0  | 0                    | 0    | 4   | 0       | 0    | 4   | 0   | 4    |
| <i>Hyphessobrycon eques</i> (Steindachner 1882)         | 0                 | 0  | 0  | 0                    | 0    | 114 | 0       | 0    | 114 | 0   | 114  |
| <i>Hyphessobrycon hasemani</i> Fowler 1913              | 0                 | 0  | 0  | 44                   | 0    | 0   | 44      | 0    | 0   | 0   | 44   |
| <i>Jupiaba cf. essequibensis</i> (Eigenmann 1909)       | 68                | 9  | 0  | 0                    | 0    | 0   | 68      | 9    | 0   | 77  | 0    |

| Taxon                                                                                         | River Margin (RM) |     |    | Floodplain lake (FL) |     |      | RM & FL |     |      | RM  | FL   |
|-----------------------------------------------------------------------------------------------|-------------------|-----|----|----------------------|-----|------|---------|-----|------|-----|------|
|                                                                                               | BW                | CW  | WW | BW                   | CW  | WW   | BW      | CW  | WW   |     |      |
| <i>Knodus heteresthes</i> (Eigenmann 1908)                                                    | 90                | 520 | 62 | 0                    | 20  | 0    | 90      | 540 | 62   | 672 | 20   |
| <i>Microschemobrycon melanatus</i> (Eigenmann 1912)                                           | 1                 | 0   | 0  | 0                    | 0   | 0    | 1       | 0   | 0    | 1   | 0    |
| <i>Microschemobrycon</i> sp.                                                                  | 0                 | 1   | 0  | 0                    | 652 | 0    | 0       | 653 | 0    | 1   | 652  |
| <i>Moenkhausia celibela</i> Marinho & Langeani 2010                                           | 166               | 0   | 0  | 17                   | 0   | 21   | 183     | 0   | 21   | 166 | 38   |
| <i>Moenkhausia ceros</i> Eigenmann 1908                                                       | 25                | 0   | 0  | 17                   | 0   | 0    | 42      | 0   | 0    | 25  | 17   |
| <i>Moenkhausia cf. jamesi</i> Eigenmann 1908                                                  | 0                 | 4   | 2  | 0                    | 1   | 0    | 0       | 5   | 2    | 6   | 1    |
| <i>Moenkhausia grandisquamis</i> (Müller & Troschel 1845)                                     | 0                 | 1   | 0  | 0                    | 3   | 0    | 0       | 4   | 0    | 1   | 3    |
| <i>Moenkhausia intermedia</i> Eigenmann 1908                                                  | 0                 | 0   | 0  | 0                    | 0   | 383  | 0       | 0   | 383  | 0   | 383  |
| <i>Moenkhausia lata</i> Eigenmann 1908                                                        | 86                | 62  | 10 | 0                    | 2   | 0    | 86      | 64  | 10   | 158 | 2    |
| <i>Moenkhausia lepidura</i> (Kner 1858)                                                       | 15                | 8   | 4  | 422                  | 30  | 33   | 437     | 38  | 37   | 27  | 485  |
| <i>Moenkhausia megalops</i> (Eigenmann 1907)                                                  | 0                 | 2   | 0  | 0                    | 0   | 0    | 0       | 2   | 0    | 2   | 0    |
| <i>Moenkhausia oligolepis</i> (Günther 1864)                                                  | 0                 | 0   | 1  | 0                    | 0   | 6    | 0       | 0   | 7    | 1   | 6    |
| <i>Moenkhausia</i> sp.                                                                        | 0                 | 0   | 0  | 0                    | 0   | 4    | 0       | 0   | 4    | 0   | 4    |
| <i>Odontostilbe fugitiva</i> Cope 1870                                                        | 0                 | 0   | 5  | 0                    | 0   | 0    | 0       | 0   | 5    | 5   | 0    |
| <i>Phenacogaster cf. retropinnus</i> Lucena & Malabarba                                       | 3                 | 0   | 0  | 0                    | 0   | 0    | 3       | 0   | 0    | 3   | 0    |
| <i>Phenacogaster pectinatus</i> (Cope 1870)                                                   | 4                 | 0   | 0  | 0                    | 0   | 0    | 4       | 0   | 0    | 4   | 0    |
| <i>Prionobrama filigera</i> (Cope 1870)                                                       | 0                 | 0   | 12 | 0                    | 0   | 679  | 0       | 0   | 691  | 12  | 679  |
| <i>Roeboides affinis</i> (Günther 1868)                                                       | 42                | 0   | 1  | 0                    | 0   | 11   | 42      | 0   | 12   | 43  | 11   |
| <i>Roeboides biserialis</i> (Garman 1890)                                                     | 3                 | 0   | 1  | 0                    | 0   | 3    | 3       | 0   | 4    | 4   | 3    |
| <i>Roeboides descalvadensis</i> Fowler 1932                                                   | 0                 | 0   | 0  | 0                    | 2   | 1526 | 0       | 2   | 1526 | 0   | 1528 |
| <i>Roeboides myersii</i> Gill 1870                                                            | 0                 | 0   | 6  | 0                    | 1   | 44   | 0       | 1   | 50   | 6   | 45   |
| <i>Stethaprion crenatum</i> Eigenmann 1916                                                    | 0                 | 0   | 0  | 0                    | 0   | 1    | 0       | 0   | 1    | 0   | 1    |
| <i>Tetragonopterus argenteus</i> Cuvier 1816                                                  | 0                 | 0   | 2  | 0                    | 0   | 2    | 0       | 0   | 4    | 2   | 2    |
| <i>Tetragonopterus chalceus</i> Spix & Agassiz 1829                                           | 1                 | 12  | 0  | 0                    | 0   | 0    | 1       | 12  | 0    | 13  | 0    |
| <b>Order Gymnotiformes</b>                                                                    |                   |     |    |                      |     |      |         |     |      |     |      |
| <b>Family Apterodontidae</b>                                                                  |                   |     |    |                      |     |      |         |     |      |     |      |
| <i>Adontosternarchus balaenops</i> (Cope, 1878)                                               | 0                 | 0   | 1  | 0                    | 0   | 0    | 0       | 0   | 1    | 1   | 0    |
| <i>Adontosternarchus clarkae</i> Mago-Leccia, Lundberg, Baskin, 1985                          | 0                 | 0   | 2  | 0                    | 0   | 0    | 0       | 0   | 2    | 2   | 0    |
| <i>Orthosternarchus tamandua</i> (Boulenger, 1898)                                            | 0                 | 0   | 1  | 0                    | 0   | 0    | 0       | 0   | 1    | 1   | 0    |
| <i>Parapteronotus hasemani</i> (Ellis, 1913)                                                  | 0                 | 0   | 2  | 0                    | 0   | 5    | 0       | 0   | 7    | 2   | 5    |
| <i>Platyrosternarchus macrostoma</i> (Günther, 1870)                                          | 0                 | 0   | 3  | 0                    | 0   | 0    | 0       | 0   | 3    | 3   | 0    |
| <i>Porotergus gimbeli</i> Ellis, 1912                                                         | 0                 | 0   | 1  | 0                    | 0   | 0    | 0       | 0   | 1    | 1   | 0    |
| <i>Sternarchella calhamazon</i> Lundberg, Cox Fernandes, Campos-da-Paz, 2013                  | 0                 | 0   | 4  | 0                    | 0   | 0    | 0       | 0   | 4    | 4   | 0    |
| <i>Sternarchella orthos</i> Mago-Leccia, 1994                                                 | 0                 | 0   | 26 | 0                    | 0   | 0    | 0       | 0   | 26   | 26  | 0    |
| <i>Sternarchella schotti</i> (Steindachner, 1868)                                             | 0                 | 0   | 0  | 0                    | 0   | 1    | 0       | 0   | 1    | 0   | 1    |
| <i>Sternarchogiton nattereri</i> (Steindachner, 1868)                                         | 0                 | 0   | 12 | 0                    | 0   | 0    | 0       | 0   | 12   | 12  | 0    |
| <i>Sternarchogiton porcinum</i> Eigenmann, Allen, 1942                                        | 0                 | 0   | 2  | 0                    | 0   | 0    | 0       | 0   | 2    | 2   | 0    |
| <i>Sternarchogiton preto</i> de Santana, Crampton, 2007                                       | 0                 | 0   | 1  | 0                    | 0   | 0    | 0       | 0   | 1    | 1   | 0    |
| <i>Sternarchorhamphus muelleri</i> (Steindachner, 1881)                                       | 0                 | 0   | 1  | 0                    | 0   | 0    | 0       | 0   | 1    | 1   | 0    |
| <i>Sternarchorhynchus goeldii</i> de Santana, Vari, 2010                                      | 0                 | 0   | 1  | 0                    | 0   | 0    | 0       | 0   | 1    | 1   | 0    |
| <i>Sternarchorhynchus retzeri</i> de Santana, Vari, 2010                                      | 0                 | 0   | 1  | 0                    | 0   | 0    | 0       | 0   | 1    | 1   | 0    |
| <b>Family Sternopygidae</b>                                                                   |                   |     |    |                      |     |      |         |     |      |     |      |
| <i>Distocyclus conirostris</i> (Eigenmann, Allen, 1942)                                       | 1                 | 0   | 0  | 0                    | 1   | 0    | 1       | 1   | 0    | 1   | 1    |
| <i>Eigenmannia limbata</i> (Schreiner, Miranda Ribeiro, Eigenmannia macrops (Boulenger, 1897) | 0                 | 0   | 1  | 0                    | 1   | 150  | 0       | 1   | 151  | 1   | 151  |
| <i>Eigenmannia sp.</i>                                                                        | 0                 | 0   | 3  | 0                    | 0   | 0    | 0       | 0   | 3    | 3   | 0    |
| <i>Rhabdolichops electrogrammus</i> Lundberg, Mago-Leccia, 1986                               | 0                 | 0   | 3  | 0                    | 0   | 0    | 0       | 0   | 3    | 3   | 0    |
| <i>Rhabdolichops lundbergi</i> Correa, Crampton, Albert, Rhabdolichops sp.                    | 0                 | 0   | 3  | 0                    | 0   | 0    | 0       | 0   | 3    | 3   | 0    |
| <i>Rhabdolichops sp.</i>                                                                      | 0                 | 0   | 5  | 0                    | 0   | 0    | 0       | 0   | 5    | 5   | 0    |
| <i>Rhabdolichops troscheli</i> (Kaup, 1856)                                                   | 0                 | 1   | 0  | 0                    | 0   | 0    | 0       | 1   | 0    | 1   | 0    |
| <i>Sternopygus macrurus</i> (Bloch, Schneider, 1801)                                          | 0                 | 0   | 1  | 0                    | 0   | 25   | 0       | 0   | 26   | 1   | 25   |
| <b>Family Hypopomidae</b>                                                                     |                   |     |    |                      |     |      |         |     |      |     |      |
| <i>Brachyhypopomus pinnicaudatus</i> (Hopkins, Comfort, Bastian, Bass, 1990)                  | 0                 | 0   | 0  | 0                    | 0   | 1    | 0       | 0   | 1    | 0   | 1    |

| Taxon                                                                | River Margin (RM) |    |    | Floodplain lake (FL) |     |     | RM & FL |     |     | RM | FL  |
|----------------------------------------------------------------------|-------------------|----|----|----------------------|-----|-----|---------|-----|-----|----|-----|
|                                                                      | BW                | CW | WW | BW                   | CW  | WW  | BW      | CW  | WW  |    |     |
| <b>Family Rhamphichthyidae</b>                                       |                   |    |    |                      |     |     |         |     |     |    |     |
| <i>Rhamphichthys drepanium</i> Triques, 1999                         | 0                 | 0  | 0  | 0                    | 0   | 7   | 0       | 0   | 7   | 0  | 7   |
| <i>Rhamphichthys heleios</i> Carvalho, Albert, 2015                  | 0                 | 0  | 1  | 0                    | 0   | 1   | 0       | 0   | 2   | 1  | 1   |
| <i>Rhamphichthys lineatus</i> Castelnau, 1855                        | 0                 | 0  | 0  | 0                    | 0   | 2   | 0       | 0   | 2   | 0  | 2   |
| <i>Rhamphichthys marmoratus</i> Castelnau 1855                       | 0                 | 0  | 0  | 0                    | 1   | 1   | 0       | 1   | 1   | 0  | 2   |
| <i>Rhamphichthys rostratus</i> (Linnaeus, 1766)                      | 0                 | 0  | 1  | 0                    | 0   | 2   | 0       | 0   | 3   | 1  | 2   |
| <i>Steatogenys elegans</i> (Steindachner, 1880)                      | 0                 | 0  | 46 | 0                    | 0   | 0   | 0       | 0   | 46  | 46 | 0   |
| <b>Order Siluriformes</b>                                            |                   |    |    |                      |     |     |         |     |     |    |     |
| <b>Family Trichomycteridae</b>                                       |                   |    |    |                      |     |     |         |     |     |    |     |
| <i>Vandellia cirrhosa</i> Valenciennes 1846                          | 0                 | 2  | 1  | 0                    | 0   | 0   | 0       | 2   | 1   | 3  | 0   |
| <b>Family Callichthyidae</b>                                         |                   |    |    |                      |     |     |         |     |     |    |     |
| <i>Corydoras hastatus</i> Eigenmann & Eigenmann 1888                 | 0                 | 0  | 1  | 0                    | 0   | 0   | 0       | 0   | 1   | 1  | 0   |
| <i>Hoplosternum littorale</i> (Hancock 1828)                         | 0                 | 0  | 0  | 0                    | 0   | 48  | 0       | 0   | 48  | 0  | 48  |
| <b>Family Loricariidae</b>                                           |                   |    |    |                      |     |     |         |     |     |    |     |
| <i>Ancistrus cf. hoplogenus</i> (Günther 1864)                       | 0                 | 0  | 0  | 0                    | 4   | 0   | 0       | 4   | 0   | 0  | 4   |
| <i>Dekeyseria scaphirhynchus</i> (Kner 1854)                         | 0                 | 0  | 0  | 1                    | 0   | 0   | 1       | 0   | 0   | 0  | 1   |
| <i>Farlowella amazonum</i> (Günther 1864)                            | 0                 | 0  | 0  | 0                    | 0   | 11  | 0       | 0   | 11  | 0  | 11  |
| <i>Hemiodontichthys acipenserinus</i> (Kner 1853)                    | 0                 | 0  | 1  | 0                    | 0   | 5   | 0       | 0   | 6   | 1  | 5   |
| <i>Hypoptopoma incognitum</i> Aquino & Schaefer 2010                 | 0                 | 0  | 10 | 0                    | 4   | 6   | 0       | 4   | 16  | 10 | 10  |
| <i>Hypostomus cf. plecostomus</i> (Linnaeus 1758)                    | 0                 | 0  | 0  | 0                    | 1   | 4   | 0       | 1   | 4   | 0  | 5   |
| <i>Limatulichthys griseus</i> (Eigenmann 1909)                       | 25                | 30 | 1  | 5                    | 99  | 1   | 30      | 129 | 2   | 56 | 105 |
| <i>Loricaria cf. cataphracta</i> Linnaeus 1758                       | 0                 | 0  | 13 | 0                    | 1   | 0   | 0       | 1   | 13  | 13 | 1   |
| <i>Loricariichthys acutus</i> (Valenciennes 1840)                    | 0                 | 1  | 3  | 0                    | 7   | 80  | 0       | 8   | 83  | 4  | 87  |
| <i>Loricariichthys nudirostris</i> (Kner 1853)                       | 0                 | 0  | 1  | 0                    | 3   | 6   | 0       | 3   | 7   | 1  | 9   |
| <i>Loricariichthys platymetopon</i> Isbrücker & Nijssen 1979         | 0                 | 0  | 0  | 0                    | 2   | 27  | 0       | 2   | 27  | 0  | 29  |
| <i>Peckoltia vittata</i> (Steindachner 1881)                         | 5                 | 5  | 1  | 1                    | 6   | 1   | 6       | 11  | 2   | 11 | 8   |
| <i>Pseudohemiodon</i> sp.                                            | 0                 | 0  | 1  | 0                    | 0   | 0   | 0       | 0   | 1   | 1  | 0   |
| <i>Pterygoplichthys gibbiceps</i> (Kner 1854)                        | 0                 | 0  | 0  | 0                    | 0   | 1   | 0       | 0   | 1   | 0  | 1   |
| <i>Pterygoplichthys pardalis</i> (Castelnau 1855)                    | 0                 | 0  | 0  | 0                    | 1   | 3   | 0       | 1   | 3   | 0  | 4   |
| <i>Pterygoplichthys punctatus</i> (Kner 1854)                        | 0                 | 0  | 0  | 0                    | 0   | 4   | 0       | 0   | 4   | 0  | 4   |
| <i>Rineloricaria</i> sp.                                             | 0                 | 0  | 0  | 0                    | 0   | 4   | 0       | 0   | 4   | 0  | 4   |
| <i>Squaliforma horrida</i> (Kner 1854)                               | 0                 | 0  | 1  | 0                    | 0   | 0   | 0       | 0   | 1   | 1  | 0   |
| <i>Sturisoma cf. rostratum</i> (Spix & Agassiz 1829)                 | 0                 | 0  | 3  | 0                    | 1   | 8   | 0       | 1   | 11  | 3  | 9   |
| <b>Family Cetopsidae</b>                                             |                   |    |    |                      |     |     |         |     |     |    |     |
| <i>Cetopsis coecutiens</i> (Lichtenstein 1819)                       | 0                 | 6  | 0  | 0                    | 0   | 0   | 0       | 6   | 0   | 6  | 0   |
| <b>Family Auchenipteridae</b>                                        |                   |    |    |                      |     |     |         |     |     |    |     |
| <i>Ageneiosus inermis</i> (Linnaeus 1766)                            | 0                 | 0  | 1  | 0                    | 0   | 6   | 0       | 0   | 7   | 1  | 6   |
| <i>Ageneiosus</i> sp.                                                | 4                 | 2  | 12 | 2                    | 0   | 30  | 6       | 2   | 42  | 18 | 32  |
| <i>Ageneiosus ucayalensis</i> Castelnau 1855                         | 0                 | 2  | 6  | 0                    | 0   | 15  | 0       | 2   | 21  | 8  | 15  |
| <i>Auchenipterichthys longimanus</i> (Günther 1864)                  | 2                 | 8  | 0  | 25                   | 18  | 0   | 27      | 26  | 0   | 10 | 43  |
| <i>Auchenipterus ambyiacus</i> Fowler 1915                           | 0                 | 0  | 6  | 0                    | 0   | 6   | 0       | 0   | 12  | 6  | 6   |
| <i>Auchenipterus cf. nuchalis</i> (Spix & Agassiz 1829)              | 1                 | 2  | 6  | 0                    | 2   | 0   | 1       | 4   | 6   | 9  | 2   |
| <i>Centromochlus existimatus</i> Mees 1974                           | 0                 | 4  | 28 | 0                    | 0   | 0   | 0       | 4   | 28  | 32 | 0   |
| <i>Centromochlus heckelii</i> (De Filippi 1853)                      | 0                 | 0  | 6  | 0                    | 0   | 1   | 0       | 0   | 7   | 6  | 1   |
| <i>Tatia intermedia</i> (Steindachner 1877)                          | 0                 | 1  | 0  | 0                    | 0   | 0   | 0       | 1   | 0   | 1  | 0   |
| <i>Tatia melanoleuca</i> Vari & Calegari 2014                        | 0                 | 21 | 0  | 0                    | 2   | 0   | 0       | 23  | 0   | 21 | 2   |
| <i>Tatia nigra</i> Sarmento-Soares & Martins-Pinheiro 2008           | 0                 | 0  | 0  | 3                    | 0   | 0   | 3       | 0   | 0   | 0  | 3   |
| <i>Tatia</i> sp.                                                     | 0                 | 2  | 2  | 0                    | 0   | 0   | 0       | 2   | 2   | 4  | 0   |
| <i>Trachelyichthys decaradiatus</i> Mees 1974                        | 0                 | 0  | 0  | 17                   | 0   | 0   | 17      | 0   | 0   | 0  | 17  |
| <i>Trachelyopterus galeatus</i> (Linnaeus 1766)                      | 2                 | 0  | 0  | 10                   | 112 | 233 | 12      | 112 | 233 | 2  | 355 |
| <i>Tympanopleura atronasus</i> (Eigenmann & Eigenmann                | 0                 | 0  | 1  | 0                    | 0   | 9   | 0       | 0   | 10  | 1  | 9   |
| <i>Tympanopleura longipinna</i> Walsh, Ribeiro & Rapp Py-Daniel 2015 | 0                 | 0  | 4  | 0                    | 0   | 1   | 0       | 0   | 5   | 4  | 1   |
| <i>Tympanopleura rondoni</i> (Miranda-Ribeiro 1914)                  | 0                 | 0  | 3  | 0                    | 0   | 13  | 0       | 0   | 16  | 3  | 13  |

| Taxon                                                             | River Margin (RM) |    |    | Floodplain lake (FL) |    |     | RM & FL |    |     | RM | FL  |
|-------------------------------------------------------------------|-------------------|----|----|----------------------|----|-----|---------|----|-----|----|-----|
|                                                                   | BW                | CW | WW | BW                   | CW | WW  | BW      | CW | WW  |    |     |
| <b>Family Doradidae</b>                                           |                   |    |    |                      |    |     |         |    |     |    |     |
| <i>Agamyxis pectinifrons</i> (Cope 1870)                          | 0                 | 0  | 0  | 0                    | 0  | 2   | 0       | 0  | 2   | 0  | 2   |
| <i>Anadoras grypus</i> (Cope 1872)                                | 0                 | 0  | 0  | 0                    | 0  | 88  | 0       | 0  | 88  | 0  | 88  |
| <i>Anduzedoras oxyrhynchus</i> (Valenciennes 1821)                | 0                 | 0  | 1  | 0                    | 0  | 0   | 0       | 0  | 1   | 1  | 0   |
| <i>Astrodoras</i> sp.                                             | 0                 | 0  | 0  | 0                    | 0  | 1   | 0       | 0  | 1   | 0  | 1   |
| <i>Hassar orestis</i> (Steindachner 1875)                         | 20                | 35 | 1  | 0                    | 14 | 0   | 20      | 49 | 1   | 56 | 14  |
| <i>Hemidoras morei</i> (Steindachner 1881)                        | 0                 | 0  | 2  | 0                    | 0  | 0   | 0       | 0  | 2   | 2  | 0   |
| <i>Nemadoras elongatus</i> (Boulenger 1898)                       | 0                 | 0  | 1  | 0                    | 0  | 0   | 0       | 0  | 1   | 1  | 0   |
| <i>Opsodoras morei</i> (Steindachner 1881)                        | 0                 | 0  | 0  | 2                    | 0  | 0   | 2       | 0  | 0   | 0  | 2   |
| <i>Ossancora asterophysa</i> Birindelli & Sabaj Pérez 2011        | 0                 | 0  | 0  | 0                    | 0  | 23  | 0       | 0  | 23  | 0  | 23  |
| <i>Oxydoras niger</i> (Valenciennes 1821)                         | 0                 | 0  | 0  | 0                    | 0  | 7   | 0       | 0  | 7   | 0  | 7   |
| <i>Platydoras armatulus</i> (Valenciennes 1840)                   | 0                 | 0  | 0  | 0                    | 0  | 2   | 0       | 0  | 2   | 0  | 2   |
| <i>Pterodoras</i> sp.                                             | 0                 | 0  | 1  | 0                    | 0  | 3   | 0       | 0  | 4   | 1  | 3   |
| <i>Scorpiodoras heckelii</i> (Kner 1855)                          | 8                 | 0  | 0  | 4                    | 0  | 0   | 12      | 0  | 0   | 8  | 4   |
| <i>Trachydoras brevis</i> (Kner 1853)                             | 0                 | 0  | 0  | 0                    | 0  | 1   | 0       | 0  | 1   | 0  | 1   |
| <i>Trachydoras nattereri</i> (Steindachner 1881)                  | 0                 | 0  | 1  | 0                    | 0  | 69  | 0       | 0  | 70  | 1  | 69  |
| <i>Trachydoras</i> sp.                                            | 0                 | 0  | 2  | 0                    | 0  | 4   | 0       | 0  | 6   | 2  | 4   |
| <i>Trachydoras steindachneri</i> (Perugia 1897)                   | 0                 | 0  | 5  | 0                    | 0  | 1   | 0       | 0  | 6   | 5  | 1   |
| <b>Family Heptapteridae</b>                                       |                   |    |    |                      |    |     |         |    |     |    |     |
| <i>Pimelodella</i> cf. <i>cristata</i> (Müller & Troschel 1849)   | 11                | 3  | 0  | 0                    | 6  | 0   | 11      | 9  | 0   | 14 | 6   |
| <i>Pimelodella</i> cf. <i>laticeps</i> Eigenmann 1917             | 0                 | 0  | 2  | 0                    | 5  | 230 | 0       | 5  | 232 | 2  | 235 |
| <i>Pimelodella</i> sp. A                                          | 0                 | 0  | 13 | 0                    | 0  | 361 | 0       | 0  | 374 | 13 | 361 |
| <i>Pimelodella</i> sp. B                                          | 0                 | 0  | 2  | 0                    | 0  | 0   | 0       | 0  | 2   | 2  | 0   |
| <b>Family Pimelodidae</b>                                         |                   |    |    |                      |    |     |         |    |     |    |     |
| <i>Brachyplatystoma vaillantii</i> (Valenciennes 1840)            | 0                 | 0  | 1  | 0                    | 0  | 1   | 0       | 0  | 2   | 1  | 1   |
| <i>Calophysus macropterus</i> (Lichtenstein 1819)                 | 0                 | 0  | 13 | 0                    | 0  | 9   | 0       | 0  | 22  | 13 | 9   |
| <i>Hemisorubim platyrhynchos</i> (Valenciennes 1840)              | 0                 | 0  | 0  | 0                    | 0  | 1   | 0       | 0  | 1   | 0  | 1   |
| <i>Hypophthalmus edentatus</i> Spix and Agassiz 1829              | 0                 | 0  | 0  | 0                    | 0  | 2   | 0       | 0  | 2   | 0  | 2   |
| <i>Hypophthalmus fimbriatus</i> Kner 1858                         | 0                 | 1  | 1  | 0                    | 3  | 0   | 0       | 4  | 1   | 2  | 3   |
| <i>Hypophthalmus marginatus</i> Valenciennes 1840                 | 0                 | 0  | 19 | 0                    | 0  | 0   | 0       | 0  | 19  | 19 | 0   |
| <i>Pimelodus blochii</i> Valenciennes 1840                        | 11                | 0  | 18 | 0                    | 0  | 54  | 11      | 0  | 72  | 29 | 54  |
| <i>Pimelodus tetramerus</i> Ribeiro & Lucena 2006                 | 21                | 27 | 2  | 0                    | 44 | 6   | 21      | 71 | 8   | 50 | 50  |
| <i>Platysilurus mucosus</i> (Vaillant 1880)                       | 0                 | 0  | 2  | 0                    | 0  | 0   | 0       | 0  | 2   | 2  | 0   |
| <i>Propimelodus</i> cf. <i>eigenmanni</i> (Van der Stigchel 1946) | 0                 | 0  | 52 | 0                    | 0  | 0   | 0       | 0  | 52  | 52 | 0   |
| <i>Pseudoplatystoma fasciatum</i> (Linnaeus 1766)                 | 0                 | 0  | 0  | 0                    | 0  | 3   | 0       | 0  | 3   | 0  | 3   |
| <i>Pseudoplatystoma punctifer</i> (Castelnau 1855)                | 0                 | 0  | 0  | 0                    | 0  | 2   | 0       | 0  | 2   | 0  | 2   |
| <i>Pseudoplatystoma tigrinum</i> (Valenciennes 1840)              | 0                 | 0  | 0  | 0                    | 0  | 7   | 0       | 0  | 7   | 0  | 7   |
| <i>Sorubim elongatus</i> Littmann, Burr, Schmidt & Isern          | 0                 | 0  | 0  | 0                    | 0  | 1   | 0       | 0  | 1   | 0  | 1   |
| <i>Sorubim lima</i> (Bloch & Schneider 1801)                      | 0                 | 0  | 5  | 0                    | 1  | 9   | 0       | 1  | 14  | 5  | 10  |
| <i>Sorubim maniradii</i> Littmann, Burr & Buitrago-Suarez         | 0                 | 2  | 0  | 0                    | 0  | 2   | 0       | 2  | 2   | 2  | 2   |
| <i>Sorubimichthys planiceps</i> (Spix & Agassiz 1829)             | 0                 | 1  | 0  | 0                    | 1  | 1   | 0       | 2  | 1   | 1  | 2   |
| <b>Order Gobiiformes</b>                                          |                   |    |    |                      |    |     |         |    |     |    |     |
| <b>Family Eleotridae</b>                                          |                   |    |    |                      |    |     |         |    |     |    |     |
| <i>Leptophilypnion pusillus</i> Roberts 2013                      | 0                 | 0  | 0  | 1                    | 0  | 0   | 1       | 0  | 0   | 0  | 1   |
| <i>Microphilypnus ternetzi</i> Myers 1927                         | 0                 | 0  | 0  | 123                  | 4  | 0   | 123     | 4  | 0   | 0  | 127 |
| <b>Order Synbranchiformes</b>                                     |                   |    |    |                      |    |     |         |    |     |    |     |
| <b>Family Synbranchidae</b>                                       |                   |    |    |                      |    |     |         |    |     |    |     |
| <i>Synbranchus madeirae</i> Rosen & Rumney 1972                   | 0                 | 0  | 1  | 0                    | 0  | 0   | 0       | 0  | 1   | 1  | 0   |
| <b>Order Pleuronectiformes</b>                                    |                   |    |    |                      |    |     |         |    |     |    |     |
| <b>Family Achiridae</b>                                           |                   |    |    |                      |    |     |         |    |     |    |     |
| <i>Hypoclinemus mentalis</i> (Günther 1862)                       | 0                 | 3  | 1  | 0                    | 27 | 0   | 0       | 30 | 1   | 4  | 27  |



| Taxon                                                    | River Margin (RM) |    |    | Floodplain lake (FL) |     |     | RM & FL |     |     | RM  | FL  |
|----------------------------------------------------------|-------------------|----|----|----------------------|-----|-----|---------|-----|-----|-----|-----|
|                                                          | BW                | CW | WW | BW                   | CW  | WW  | BW      | CW  | WW  |     |     |
| <b>Order Cichliformes</b>                                |                   |    |    |                      |     |     |         |     |     |     |     |
| <b>Family Cichlidae</b>                                  |                   |    |    |                      |     |     |         |     |     |     |     |
| <i>Acarichthys heckelii</i> (Müller & Troschel 1849)     | 6                 | 13 | 0  | 223                  | 84  | 3   | 229     | 97  | 3   | 19  | 310 |
| <i>Acaronia nassa</i> (Heckel 1840)                      | 0                 | 0  | 0  | 5                    | 0   | 4   | 5       | 0   | 4   | 0   | 9   |
| <i>Apistogramma cf. gephyra</i> Kullander 1980           | 0                 | 0  | 0  | 1                    | 0   | 0   | 1       | 0   | 0   | 0   | 1   |
| <i>Apistogramma pertensis</i> (Haseman 1911)             | 0                 | 0  | 0  | 3                    | 6   | 0   | 3       | 6   | 0   | 0   | 9   |
| <i>Apistogramma regani</i> Kullander 198                 | 0                 | 0  | 0  | 3                    | 0   | 58  | 3       | 0   | 58  | 0   | 61  |
| <i>Astronotus ocellatus</i> (Agassiz 1831)               | 0                 | 0  | 0  | 0                    | 0   | 2   | 0       | 0   | 2   | 0   | 2   |
| <i>Biotoecus opercularis</i> (Steindachner 1875)         | 0                 | 0  | 0  | 156                  | 26  | 0   | 156     | 26  | 0   | 0   | 182 |
| <i>Chaetobranchopsis orbicularis</i> (Steindachner 1875) | 0                 | 0  | 0  | 0                    | 0   | 14  | 0       | 0   | 14  | 0   | 14  |
| <i>Cichla monoculus</i> Spix & Agassiz 1831              | 0                 | 0  | 0  | 0                    | 20  | 12  | 0       | 20  | 12  | 0   | 32  |
| <i>Cichla pinima</i> Kullander & Ferreira 2006           | 23                | 28 | 0  | 7                    | 25  | 0   | 30      | 53  | 0   | 51  | 32  |
| <i>Cichlasoma amazonarum</i> Kullander 1983              | 0                 | 0  | 0  | 0                    | 0   | 1   | 0       | 0   | 1   | 0   | 1   |
| <i>Crenicichla acutirostris</i> Günther 1862             | 1                 | 0  | 0  | 1                    | 1   | 0   | 2       | 1   | 0   | 1   | 2   |
| <i>Crenicichla cf. inpa</i> Ploeg 1991                   | 0                 | 0  | 0  | 0                    | 0   | 4   | 0       | 0   | 4   | 0   | 4   |
| <i>Crenicichla johanna</i> Heckel 1840                   | 0                 | 0  | 0  | 0                    | 1   | 0   | 0       | 1   | 0   | 0   | 1   |
| <i>Crenicichla macropthalma</i> Heckel 1840              | 2                 | 1  | 0  | 0                    | 0   | 0   | 2       | 1   | 0   | 3   | 0   |
| <i>Crenicichla marmorata</i> Pellegrin 1904              | 0                 | 0  | 0  | 1                    | 0   | 0   | 1       | 0   | 0   | 0   | 1   |
| <i>Crenicichla multispinosa</i> (Pellegrin 1903)         | 0                 | 0  | 0  | 0                    | 1   | 0   | 0       | 1   | 0   | 0   | 1   |
| <i>Crenicichla regani</i> Ploeg 1989                     | 0                 | 1  | 0  | 2                    | 0   | 0   | 2       | 1   | 0   | 1   | 2   |
| <i>Crenicichla reticulata</i> (Heckel 1840)              | 0                 | 4  | 2  | 0                    | 0   | 3   | 0       | 4   | 5   | 6   | 3   |
| <i>Crenicichla sp.</i>                                   | 0                 | 0  | 0  | 3                    | 2   | 0   | 3       | 2   | 0   | 0   | 5   |
| <i>Geophagus altifrons</i> Heckel 1840                   | 188               | 57 | 16 | 30                   | 224 | 5   | 218     | 281 | 21  | 261 | 259 |
| <i>Geophagus sp.</i>                                     | 0                 | 2  | 0  | 2                    | 102 | 12  | 2       | 104 | 12  | 2   | 116 |
| <i>Hypselecara temporalis</i> (Günther 1862)             | 0                 | 0  | 0  | 1                    | 0   | 2   | 1       | 0   | 2   | 0   | 3   |
| <i>Laetacara curviceps</i> (Ahl 1923)                    | 0                 | 0  | 0  | 26                   | 2   | 4   | 26      | 2   | 4   | 0   | 32  |
| <i>Mesonauta festivus</i> (Heckel 1840)                  | 21                | 0  | 0  | 10                   | 0   | 199 | 31      | 0   | 199 | 21  | 209 |
| <i>Mesonauta insignis</i> (Heckel 1840)                  | 0                 | 0  | 0  | 16                   | 1   | 95  | 16      | 1   | 95  | 0   | 112 |
| <i>Pterophyllum scalare</i> (Schultze 1823)              | 0                 | 0  | 0  | 0                    | 0   | 33  | 0       | 0   | 33  | 0   | 33  |
| <i>Satanoperca acuticeps</i> (Heckel 1840)               | 1                 | 0  | 0  | 12                   | 4   | 1   | 13      | 4   | 1   | 1   | 17  |
| <i>Satanoperca daemon</i> (Heckel 1840)                  | 0                 | 0  | 0  | 5                    | 0   | 0   | 5       | 0   | 0   | 0   | 5   |
| <i>Satanoperca jurupari</i> (Heckel 1840)                | 0                 | 0  | 1  | 0                    | 3   | 58  | 0       | 3   | 59  | 1   | 61  |
| <i>Taeniacara candidi</i> Myers 1935                     | 0                 | 0  | 0  | 0                    | 2   | 0   | 0       | 2   | 0   | 0   | 2   |
| <b>Order Cyprinodontiformes</b>                          |                   |    |    |                      |     |     |         |     |     |     |     |
| <b>Family Fluviphylacidae</b>                            |                   |    |    |                      |     |     |         |     |     |     |     |
| <i>Fluviphylax cf. simplex</i> Costa 1996                | 0                 | 0  | 0  | 10                   | 0   | 0   | 10      | 0   | 0   | 0   | 10  |
| <b>Family Poeciliidae</b>                                |                   |    |    |                      |     |     |         |     |     |     |     |
| <i>Pamphorichthys scalpridens</i> (Garman 1895)          | 6                 | 0  | 0  | 23                   | 0   | 15  | 29      | 0   | 15  | 6   | 38  |
| <b>Order Beloniformes</b>                                |                   |    |    |                      |     |     |         |     |     |     |     |
| <b>Family Hemiramphidae</b>                              |                   |    |    |                      |     |     |         |     |     |     |     |
| <i>Hyporhamphus brederi</i> (Fernández-Yépez 1948)       | 1                 | 1  | 2  | 0                    | 0   | 0   | 1       | 1   | 2   | 4   | 0   |
| <b>Family Belonidae</b>                                  |                   |    |    |                      |     |     |         |     |     |     |     |
| <i>Potamorhaphis guianensis</i> (Jardine 1843)           | 0                 | 0  | 1  | 0                    | 0   | 5   | 0       | 0   | 6   | 1   | 5   |
| <i>Pseudotylorus angusticeps</i> (Günther 1866)          | 0                 | 1  | 0  | 0                    | 0   | 0   | 0       | 1   | 0   | 1   | 0   |
| <i>Pseudotylorus microps</i> (Günther 1866)              | 0                 | 7  | 6  | 1                    | 0   | 0   | 1       | 7   | 6   | 13  | 1   |
| <b>Order Tetraodontiformes</b>                           |                   |    |    |                      |     |     |         |     |     |     |     |
| <b>Family Tetraodontidae</b>                             |                   |    |    |                      |     |     |         |     |     |     |     |
| <i>Colomesus asellus</i> (Müller & Troschel 1849)        | 17                | 50 | 12 | 0                    | 1   | 0   | 17      | 51  | 12  | 79  | 1   |
| <b>Order Perciformes</b>                                 |                   |    |    |                      |     |     |         |     |     |     |     |
| <b>Family Sciaenidae</b>                                 |                   |    |    |                      |     |     |         |     |     |     |     |
| <i>Pachypops fourcroyi</i> (Lacepède 1802)               | 26                | 33 | 13 | 0                    | 5   | 2   | 26      | 38  | 15  | 72  | 7   |
| <i>Pachypops pigmaeus</i> Casatti 2002                   | 0                 | 2  | 0  | 0                    | 0   | 0   | 0       | 2   | 0   | 2   | 0   |
| <i>Plagioscion auratus</i> (Castelnau 1855)              | 0                 | 3  | 4  | 0                    | 0   | 27  | 0       | 3   | 31  | 7   | 27  |
| <i>Plagioscion squamosissimus</i> (Heckel 1840)          | 21                | 13 | 12 | 7                    | 2   | 77  | 28      | 15  | 89  | 46  | 86  |
| <b>Order Ceratodontiformes</b>                           |                   |    |    |                      |     |     |         |     |     |     |     |
| <b>Family Lepidosirenidae</b>                            |                   |    |    |                      |     |     |         |     |     |     |     |
| <i>Lepidosiren paradoxa</i> Fitzinger 1837               | 0                 | 0  | 0  | 0                    | 0   | 1   | 0       | 0   | 1   | 0   | 1   |

<sup>1</sup> Taxonomy follows: Eschmeyer WN, Van de Laan, R., Fricke R. 2019. Eschmeyer's catalog of fishes. <http://researcharchive.calacademy.org/research/ichthyology/catalog/fishcatmain.asp> (Electronic version: accessed 01 October 2019); Fricke R, Eschmeyer WN, Fong JD. 2019. Species by family/sub-family In Eschmeyer's Catalog of fishes. <http://researcharchive.calacademy.org/research/ichthyology/catalog/SpeciesByFamily.asp> (Electronic version accessed 01 October 2019).

**Table S4.** Permutational multivariate analysis of variance (PERMANOVA) comparisons of fish assemblage structure between blackwater (BW), clearwater (CW), and whitewater (WW) systems of the Santarém region. All comparisons are significant at  $\alpha = 0.001$ . DF = degrees of freedom.

| Comparison        | River Margins (RM) |      |       | Floodplain lakes (FL) |      |       | Pooled RM and FL |      |       |
|-------------------|--------------------|------|-------|-----------------------|------|-------|------------------|------|-------|
|                   | Pseudo <i>F</i>    | R    | DF    | Pseudo <i>F</i>       | R    | DF    | Pseudo <i>F</i>  | R    | DF    |
| Global (BW-CW=WW) | 4.5                | 0.47 | 2, 33 | 5.0                   | 0.48 | 2, 34 | 7.4              | 0.41 | 2, 68 |
| BW-CW             | 2.4                | 0.31 | 1, 22 | 2.6                   | 0.32 | 1, 22 | 3.8              | 0.27 | 1, 46 |
| BW-WW             | 5.0                | 0.44 | 1, 21 | 6.2                   | 0.47 | 1, 22 | 8.5              | 0.4  | 1, 45 |
| CW-WW             | 5.9                | 0.47 | 1, 21 | 6.2                   | 0.47 | 1, 22 | 9.8              | 0.42 | 1, 45 |

**Table S5.** Results of generalized linear mixed models (GLMMs) for the effect of water type (BW = blackwater, CW = clearwater, WW = whitewater) and habitat type (river margin, floodplain lake) on fish biomass, abundance, and richness. For each response variable we repeat the GLMM with the exclusion/inclusion of outlier sample events, and with the following data filtering procedures: For *biomass*: exclusion of large individuals (those with a mass exceeding 3 standard deviations of the mean fish mass for all our combined samples). For abundance and richness: exclusion of rare species (species represented by < 4 individuals in all our combined samples), exclusion of dominant species (the top 10% most numerically abundant species, in all our combined samples), exclusion of both rare and dominant species. Results are divided into: a. Type-3 Wald’s test. b. Number of fish and sample event numbers for each water type/habitat combination. c. Marginal and conditional R<sup>2</sup> values. d. Tukey post-hoc comparisons of disparities between all water type/habitat combinations. Here only significant disparities at  $\alpha = 0.05$  are shown. e. Least square means and 95% confidence intervals. f. Original means.

| a.        |                       |                                    |         | Wald’s tests (bold = significant at alpha = 0.05) |     |                |                   |      |          |                   |      |                |
|-----------|-----------------------|------------------------------------|---------|---------------------------------------------------|-----|----------------|-------------------|------|----------|-------------------|------|----------------|
|           |                       |                                    |         | Water type (WT)                                   |     |                | Habitat type (HT) |      |          | WT:HT interaction |      |                |
| Response  | Outlier sample events | Data filtering                     | Figure  | Chi-sq                                            | d.f | <i>p</i>       | Chi-sq            | d.f. | <i>p</i> | Chi-sq            | d.f. | <i>p</i>       |
| Biomass   | Excluded              | None                               | Fig. 5b | 57.5                                              | 2   | <b>3.3E-13</b> | 3.321             | 1    | 0.07     | 28.3              | 2    | <b>7.0E-07</b> |
| Biomass   | Included              | None                               | -       | 21.1                                              | 2   | <b>2.6E-05</b> | 1.143             | 1    | 0.28     | 10.9              | 2    | <b>4.3E-03</b> |
| Biomass   | Excluded              | Large individuals removed          | -       | 29.9                                              | 2   | <b>3.2E-07</b> | 0.660             | 1    | 0.41     | 23.8              | 2    | <b>6.6E-06</b> |
| Abundance | Excluded              | None                               | Fig. 5c | 22.4                                              | 2   | <b>1.4E-05</b> | 0.003             | 1    | 0.96     | 20.2              | 2    | <b>2.7E-07</b> |
| Abundance | Included              | None                               | -       | 9.9                                               | 2   | <b>7.3E-03</b> | 0.221             | 1    | 0.64     | 18.4              | 2    | <b>1.0E-04</b> |
| Abundance | Excluded              | Rare species excluded              | -       | 2.3                                               | 2   | <b>1.2E-05</b> | 0.001             | 1    | 0.97     | 3.2               | 2    | <b>1.1E-07</b> |
| Abundance | Excluded              | Dominant species excluded          | -       | 26.2                                              | 2   | <b>2.0E-06</b> | 0.415             | 1    | 0.52     | 20.8              | 2    | <b>3.1E-05</b> |
| Abundance | Excluded              | Rare and dominant species excluded | -       | 36.4                                              | 2   | <b>1.3E-08</b> | 0.792             | 1    | 0.37     | 28.7              | 2    | <b>5.9E-07</b> |
| Richness  | Excluded              | None                               | Fig. 5a | 32.1                                              | 2   | <b>1.1E-07</b> | 1.130             | 1    | 0.29     | 14.9              | 2    | <b>5.9E-04</b> |
| Richness  | Included              | None                               | -       | 23.3                                              | 2   | <b>8.6E-06</b> | 0.850             | 1    | 0.36     | 11.0              | 2    | <b>4.0E-03</b> |
| Richness  | Excluded              | Rare species excluded              | -       | 43.1                                              | 2   | <b>4.4E-10</b> | 2.387             | 1    | 0.12     | 23.4              | 2    | <b>8.4E-06</b> |
| Richness  | Excluded              | Dominant species excluded          | -       | 40.4                                              | 2   | <b>1.7E-09</b> | 0.718             | 1    | 0.40     | 11.0              | 2    | <b>4.2E-03</b> |
| Richness  | Excluded              | Rare and dominant species excluded | -       | 48.2                                              | 2   | <b>3.4E-11</b> | 1.217             | 1    | 0.27     | 16.2              | 2    | <b>3.0E-04</b> |

  

| b.        |                       |                                    |        | n. fish / n. sample events |       |       |       |       |       |       |
|-----------|-----------------------|------------------------------------|--------|----------------------------|-------|-------|-------|-------|-------|-------|
| Response  | Outlier sample events | Data filtering                     | n fish | BW RM                      | BW FL | CW RM | CW FL | WW RM | WW FL | TOTAL |
| Biomass   | Excluded              | None                               | 20070  | 12                         | 11    | 12    | 10    | 11    | 12    | 68    |
| Biomass   | Included              | None                               | 22398  | 12                         | 12    | 12    | 12    | 11    | 12    | 71    |
| Biomass   | Excluded              | Large individuals removed          | 18449  | 11                         | 11    | 11    | 10    | 10    | 12    | 65    |
| Abundance | Excluded              | None                               | 13904  | 11                         | 12    | 12    | 10    | 9     | 11    | 65    |
| Abundance | Included              | None                               | 22398  | 12                         | 12    | 12    | 12    | 11    | 12    | 71    |
| Abundance | Excluded              | Rare species excluded              | 13772  | 11                         | 12    | 12    | 10    | 9     | 11    | 65    |
| Abundance | Excluded              | Dominant species excluded          | 5192   | 12                         | 11    | 10    | 11    | 9     | 12    | 65    |
| Abundance | Excluded              | Rare and dominant species excluded | 5063   | 12                         | 11    | 10    | 11    | 9     | 12    | 65    |
| Richness  | Excluded              | None                               | 21344  | 12                         | 12    | 10    | 12    | 10    | 12    | 68    |
| Richness  | Included              | None                               | 22398  | 12                         | 12    | 12    | 12    | 11    | 12    | 71    |
| Richness  | Excluded              | Rare species excluded              | 21197  | 12                         | 12    | 10    | 12    | 10    | 12    | 68    |
| Richness  | Excluded              | Dominant species excluded          | 5879   | 12                         | 11    | 10    | 11    | 9     | 12    | 65    |
| Richness  | Excluded              | Rare and dominant species excluded | 5881   | 12                         | 11    | 11    | 12    | 10    | 12    | 68    |

| c.        |                       |                                    | R <sup>2</sup> values   |                            |
|-----------|-----------------------|------------------------------------|-------------------------|----------------------------|
| Response  | Outlier sample events | Data filtering                     | Marginal R <sup>2</sup> | Conditional R <sup>2</sup> |
| Biomass   | Excluded              | None                               | 0.429                   | 0.573                      |
| Biomass   | Included              | None                               | 0.284                   | 0.489                      |
| Biomass   | Excluded              | Large individuals removed          | 0.428                   | 0.618                      |
| Abundance | Excluded              | None                               | 0.136                   | 0.803                      |
| Abundance | Included              | None                               | 0.085                   | 0.796                      |
| Abundance | Excluded              | Rare species excluded              | 0.141                   | 0.807                      |
| Abundance | Excluded              | Dominant species excluded          | 0.22                    | 0.73                       |
| Abundance | Excluded              | Rare and dominant species excluded | 0.224                   | 0.734                      |
| Richness  | Excluded              | None                               | 0.216                   | 0.681                      |
| Richness  | Included              | None                               | 0.188                   | 0.709                      |
| Richness  | Excluded              | Rare species excluded              | 0.222                   | 0.673                      |
| Richness  | Excluded              | Dominant species excluded          | 0.293                   | 0.613                      |
| Richness  | Excluded              | Rare and dominant species excluded | 0.292                   | 0.6                        |

  

| d.        |                       |                                    | Tukey post-hoc comparisons (bold = significant at alpha = 0.05) |          |         |          |         |          |
|-----------|-----------------------|------------------------------------|-----------------------------------------------------------------|----------|---------|----------|---------|----------|
| Response  | Outlier sample events | Data filtering                     | BWF-BWR                                                         |          | BWF-CWF |          | BWF-CWR |          |
|           |                       |                                    |                                                                 | <i>p</i> |         | <i>p</i> |         | <i>p</i> |
| Biomass   | Excluded              | None                               | BWF-BWR                                                         | 0.4512   | BWF-CWF | 1        | BWF-CWR | 0.9459   |
| Biomass   | Included              | None                               | BWF-BWR                                                         | 0.8937   | BWF-CWF | 0.8462   | BWF-CWR | 0.9988   |
| Biomass   | Excluded              | Large individuals removed          | BWF-BWR                                                         | 0.9654   | BWF-CWF | 0.9493   | BWF-CWR | 0.9332   |
| Abundance | Excluded              | None                               | BWF-BWR                                                         | 1        | BWF-CWF | 0.3768   | BWF-CWR | 0.9961   |
| Abundance | Included              | None                               | BWF-BWR                                                         | 0.9972   | BWF-CWF | 0.9998   | BWF-CWR | 1        |
| Abundance | Excluded              | Rare species excluded              | BWF-BWR                                                         | 1        | BWF-CWF | 0.35     | BWF-CWR | 0.9965   |
| Abundance | Excluded              | Dominant species excluded          | BWF-BWR                                                         | 0.9656   | BWF-CWF | 0.9999   | BWF-CWR | 0.9953   |
| Abundance | Excluded              | Rare and dominant species excluded | BWF-BWR                                                         | 0.949    | BWF-CWF | 0.9999   | BWF-CWR | 0.9968   |
| Richness  | Excluded              | None                               | BWF-BWR                                                         | 0.8961   | BWF-CWF | 0.8951   | BWF-CWR | 0.9096   |
| Richness  | Included              | None                               | BWF-BWR                                                         | 0.9411   | BWF-CWF | 0.9414   | BWF-CWR | 0.7567   |
| Richness  | Excluded              | Rare species excluded              | BWF-BWR                                                         | 0.6349   | BWF-CWF | 0.6984   | BWF-CWR | 0.7428   |
| Richness  | Excluded              | Dominant species excluded          | BWF-BWR                                                         | 0.9584   | BWF-CWF | 0.8748   | BWF-CWR | 0.9234   |
| Richness  | Excluded              | Rare and dominant species excluded | BWF-BWR                                                         | 0.8801   | BWF-CWF | 0.7847   | BWF-CWR | 0.8079   |

  

| BWF-WWF | <i>p</i>         | BWF-WWR | <i>p</i>      | BWR-CWF | <i>p</i> | BWR-CWR | <i>p</i> | BWR-WWF | <i>p</i>         | BWR-WWR | <i>p</i>      |
|---------|------------------|---------|---------------|---------|----------|---------|----------|---------|------------------|---------|---------------|
| BWF<WWF | <b>&lt;.0001</b> | BWF-WWR | 0.7118        | BWR-CWF | 0.5677   | BWR-CWR | 0.9309   | BWR-WWF | <b>&lt;.0001</b> | BWR-WWR | 0.9991        |
| BWF<WWF | <b>0.0001</b>    | BWF-WWR | 0.9643        | BWR-CWF | 1        | BWR-CWR | 0.9847   | BWR-WWF | <b>0.0092</b>    | BWR-WWR | 0.9999        |
| BWF<WWF | <b>&lt;.0001</b> | BWF-WWR | 0.9974        | BWR-CWF | 1        | BWR-CWR | 1        | BWR-WWF | <b>0.0003</b>    | BWR-WWR | 0.8017        |
| BWF<WWF | <b>0.0309</b>    | BWF>WWR | <b>0.0173</b> | BWR-CWF | 0.435    | BWR-CWR | 0.9979   | BWR-WWF | <b>0.0326</b>    | BWR>WWR | <b>0.0238</b> |
| BWF<WWF | <b>0.0484</b>    | BWF-WWR | 0.1668        | BWR-CWF | 1        | BWR-CWR | 0.9892   | BWR-WWF | 0.1466           | BWR-WWR | 0.0539        |
| BWF<WWF | <b>0.0319</b>    | BWF>WWR | <b>0.0096</b> | BWR-CWF | 0.3922   | BWR-CWR | 0.9976   | BWR-WWF | <b>0.0363</b>    | BWR>WWR | <b>0.0124</b> |
| BWF<WWF | <b>&lt;.0001</b> | BWF-WWR | 0.8117        | BWR-CWF | 0.8962   | BWR-CWR | 0.7857   | BWR-WWF | <b>0.0002</b>    | BWR-WWR | 0.3254        |
| BWF<WWF | <b>&lt;.0001</b> | BWF-WWR | 0.721         | BWR-CWF | 0.8673   | BWR-CWR | 0.7678   | BWR-WWF | <b>0.0003</b>    | BWR-WWR | 0.208         |
| BWF<WWF | <b>&lt;.0001</b> | BWF-WWR | 0.9454        | BWR-CWF | 1        | BWR-CWR | 1        | BWR-WWF | <b>0.0003</b>    | BWR-WWR | 1             |
| BWF<WWF | <b>0.0001</b>    | BWF-WWR | 0.9076        | BWR-CWF | 1        | BWR-CWR | 0.9981   | BWR-WWF | <b>0.004</b>     | BWR-WWR | 1             |
| BWF<WWF | <b>&lt;.0001</b> | BWF-WWR | 0.9664        | BWR-CWF | 1        | BWR-CWR | 1        | BWR-WWF | <b>&lt;.0001</b> | BWR-WWR | 0.986         |
| BWF<WWF | <b>&lt;.0001</b> | BWF-WWR | 0.3769        | BWR-CWF | 0.9998   | BWR-CWR | 1        | BWR-WWF | <b>&lt;.0001</b> | BWR-WWR | 0.8648        |
| BWF<WWF | <b>&lt;.0001</b> | BWF-WWR | 0.4704        | BWR-CWF | 1        | BWR-CWR | 1        | BWR-WWF | <b>&lt;.0001</b> | BWR-WWR | 0.9741        |

| CWF-CWR | <i>p</i> | CWF-WWF | <i>p</i>      | CWF-WWR | <i>p</i> | CWR-WWF | <i>p</i>      | CWR-WWR | <i>p</i>      | WWR-WWF | <i>p</i>      |
|---------|----------|---------|---------------|---------|----------|---------|---------------|---------|---------------|---------|---------------|
| CWF-CWR | 0.9775   | CWF<WWF | <.0001        | CWF-WWR | 0.8053   | CWR<WWF | <.0001        | CWR-WWR | 0.9933        | WWR<WWF | <.0001        |
| CWF-CWR | 0.9657   | CWF<WWF | <b>0.0236</b> | CWF-WWR | 0.999    | CWR<WWF | <b>0.0007</b> | CWR-WWR | 0.998         | WWR<WWF | <b>0.0056</b> |
| CWF-CWR | 1        | CWF<WWF | <b>0.0004</b> | CWF-WWR | 0.7734   | CWR<WWF | <b>0.0005</b> | CWR-WWR | 0.7323        | WWR<WWF | <.0001        |
| CWF-CWR | 0.6852   | CWF<WWF | <.0001        | CWF-WWR | 0.7795   | CWR<WWF | <b>0.0081</b> | CWR-WWR | 0.0647        | WWR<WWF | <.0001        |
| CWF-CWR | 0.9983   | CWF<WWF | 0.1234        | CWF-WWR | 0.1201   | CWR<WWF | <b>0.0372</b> | CWR-WWR | 0.2401        | WWR<WWF | <.0001        |
| CWF-CWR | 0.6491   | CWF<WWF | <.0001        | CWF-WWR | 0.7006   | CWR<WWF | <b>0.0088</b> | CWR-WWR | <b>0.0379</b> | WWR<WWF | <.0001        |
| CWF-CWR | 0.9997   | CWF<WWF | <.0001        | CWF-WWR | 0.9058   | CWR<WWF | <.0001        | CWR-WWR | 0.9775        | WWR<WWF | <.0001        |
| CWF-CWR | 0.9999   | CWF<WWF | <.0001        | CWF-WWR | 0.8348   | CWR<WWF | <.0001        | CWR-WWR | 0.9383        | WWR<WWF | <.0001        |
| CWF-CWR | 1        | CWF<WWF | <b>0.0003</b> | CWF-WWR | 1        | CWR<WWF | <b>0.0011</b> | CWR-WWR | 1             | WWR<WWF | <b>0.0006</b> |
| CWF-CWR | 0.998    | CWF<WWF | <b>0.004</b>  | CWF-WWR | 1        | CWR<WWF | <b>0.0191</b> | CWR-WWR | 0.9997        | WWR<WWF | <b>0.0097</b> |
| CWF-CWR | 1        | CWF<WWF | <.0001        | CWF-WWR | 0.9932   | CWR<WWF | <b>0.0002</b> | CWR-WWR | 0.9939        | WWR<WWF | <.0001        |
| CWF-CWR | 1        | CWF<WWF | <.0001        | CWF-WWR | 0.9505   | CWR<WWF | <b>0.0002</b> | CWR-WWR | 0.9562        | WWR<WWF | <b>0.0038</b> |
| CWF-CWR | 1        | CWF<WWF | <.0001        | CWF-WWR | 0.9931   | CWR<WWF | <.0001        | CWR-WWR | 0.994         | WWR<WWF | <b>0.0002</b> |

e.

|           |                       |                                    | Least square (ls) means and lowe (L) and upper (U) 95% confidence intervals |       |       |         |       |       |         |       |       |
|-----------|-----------------------|------------------------------------|-----------------------------------------------------------------------------|-------|-------|---------|-------|-------|---------|-------|-------|
|           |                       |                                    | BW RM                                                                       |       |       | BW FL   |       |       | CW RM   |       |       |
| Response  | Outlier sample events | Data filtering                     | ls mean                                                                     | L 95% | U 95% | ls mean | L 95% | U 95% | ls mean | L 95% | U 95% |
| Biomass   | Excluded              | None                               | 8.04                                                                        | 7.52  | 8.57  | 7.6     | 7.07  | 8.14  | 7.82    | 7.29  | 8.34  |
| Biomass   | Included              | None                               | 8.03                                                                        | 7.4   | 8.67  | 7.67    | 7.04  | 8.31  | 7.81    | 7.17  | 8.44  |
| Biomass   | Excluded              | Large individuals removed          | 7.35                                                                        | 6.7   | 8.01  | 7.11    | 6.46  | 7.75  | 7.39    | 6.74  | 8.04  |
| Abundance | Excluded              | None                               | 4.74                                                                        | 3.74  | 5.73  | 4.75    | 3.76  | 5.74  | 4.62    | 3.63  | 5.61  |
| Abundance | Included              | None                               | 4.9                                                                         | 3.74  | 6.05  | 4.75    | 3.6   | 5.9   | 4.7     | 3.55  | 5.86  |
| Abundance | Excluded              | Rare species excluded              | 4.73                                                                        | 3.73  | 5.73  | 4.73    | 3.74  | 5.73  | 4.61    | 3.61  | 5.6   |
| Abundance | Excluded              | Dominant species excluded          | 4                                                                           | 3.35  | 4.66  | 3.82    | 3.15  | 4.48  | 3.69    | 3.02  | 4.37  |
| Abundance | Excluded              | Rare and dominant species excluded | 3.99                                                                        | 3.33  | 4.65  | 3.79    | 3.12  | 4.45  | 3.67    | 2.99  | 4.35  |
| Richness  | Excluded              | None                               | 2.92                                                                        | 2.49  | 3.34  | 2.73    | 2.3   | 3.16  | 2.92    | 2.48  | 3.36  |
| Richness  | Included              | None                               | 2.91                                                                        | 2.45  | 3.37  | 2.72    | 2.25  | 3.19  | 3       | 2.53  | 3.46  |
| Richness  | Excluded              | Rare species excluded              | 2.88                                                                        | 2.49  | 3.27  | 2.64    | 2.24  | 3.04  | 2.87    | 2.46  | 3.28  |
| Richness  | Excluded              | Dominant species excluded          | 2.62                                                                        | 2.25  | 3     | 2.47    | 2.08  | 2.85  | 2.66    | 2.26  | 3.07  |
| Richness  | Excluded              | Rare and dominant species excluded | 2.57                                                                        | 2.23  | 2.92  | 2.39    | 2.03  | 2.75  | 2.61    | 2.25  | 2.96  |

| CW FL   |       |       | WW RM   |       |       | WW FL   |       |       |
|---------|-------|-------|---------|-------|-------|---------|-------|-------|
| ls mean | L 95% | U 95% | ls mean | L 95% | U 95% | ls mean | L 95% | U 95% |
| 7.64    | 7.09  | 8.18  | 7.95    | 7.42  | 8.49  | 9.21    | 8.68  | 9.73  |
| 8.09    | 7.43  | 8.75  | 7.96    | 7.31  | 8.61  | 9.18    | 8.55  | 9.82  |
| 7.37    | 6.72  | 8.03  | 6.97    | 6.31  | 7.63  | 8.62    | 7.98  | 9.26  |
| 4.21    | 3.2   | 5.22  | 3.8     | 2.78  | 4.83  | 5.54    | 4.55  | 6.54  |
| 4.84    | 3.68  | 6     | 4.02    | 2.86  | 5.18  | 5.62    | 4.47  | 6.77  |
| 4.18    | 3.17  | 5.2   | 3.74    | 2.71  | 4.77  | 5.53    | 4.53  | 6.53  |
| 3.76    | 3.1   | 4.43  | 3.5     | 2.81  | 4.19  | 4.94    | 4.28  | 5.59  |
| 3.73    | 3.07  | 4.4   | 3.43    | 2.74  | 4.12  | 4.91    | 4.25  | 5.56  |
| 2.92    | 2.49  | 3.34  | 2.9     | 2.46  | 3.34  | 3.63    | 3.22  | 4.05  |
| 2.91    | 2.45  | 3.37  | 2.94    | 2.46  | 3.41  | 3.62    | 3.17  | 4.08  |
| 2.86    | 2.47  | 3.26  | 2.77    | 2.36  | 3.18  | 3.54    | 3.16  | 3.92  |
| 2.67    | 2.3   | 3.05  | 2.84    | 2.45  | 3.23  | 3.49    | 3.13  | 3.85  |
| 2.61    | 2.26  | 2.95  | 2.7     | 2.34  | 3.06  | 3.38    | 3.05  | 3.71  |

| f.        |          |                                    | Original means |        |        |        |        |        |         |
|-----------|----------|------------------------------------|----------------|--------|--------|--------|--------|--------|---------|
|           |          |                                    | unit           | BW RM  | BW FL  | CW RM  | CW FL  | WW RM  | WW FL   |
| Biomass   | Excluded | None                               | grams          | 3813.9 | 1973.4 | 2609.4 | 2363.1 | 3177.6 | 11378.6 |
| Biomass   | Included | None                               | grams          | 3813.9 | 2333.6 | 2609.4 | 4409.3 | 3177.6 | 11378.6 |
| Biomass   | Excluded | Large individuals removed          | grams          | 1950.3 | 1194.7 | 1553.8 | 1860.1 | 1094.9 | 7737.4  |
| Abundance | Excluded | None                               | n              | 223.3  | 209.9  | 144.9  | 97.4   | 38.2   | 533.8   |
| Abundance | Included | None                               | n              | 341.5  | 209.9  | 144.9  | 347.2  | 82.8   | 747.1   |
| Abundance | Excluded | Rare species excluded              | n              | 222.1  | 208.2  | 143.5  | 96.0   | 36.1   | 529.5   |
| Abundance | Excluded | Dominant species excluded          | n              | 78.5   | 54.5   | 35.9   | 58.1   | 31.9   | 197.1   |
| Abundance | Excluded | Rare and dominant species excluded | n              | 77.3   | 52.8   | 35.0   | 56.8   | 29.8   | 192.6   |
| Richness  | Excluded | None                               | n              | 20.6   | 16.3   | 17.5   | 21.2   | 19.5   | 43.9    |
| Richness  | Included | None                               | n              | 20.6   | 16.3   | 21.1   | 21.2   | 22.8   | 43.9    |
| Richness  | Excluded | Rare species excluded              | n              | 19.7   | 14.8   | 16.7   | 20.0   | 16.9   | 39.7    |
| Richness  | Excluded | Dominant species excluded          | n              | 14.9   | 12.3   | 14.1   | 16.0   | 17.9   | 36.5    |
| Richness  | Excluded | Rare and dominant species excluded | n              | 14.0   | 11.5   | 13.5   | 14.8   | 15.3   | 32.3    |
